# Supplementary material for: GenomeScope 2.0 and Smudgeplot for reference-free profiling of polyploid genomes
Source: PubMed Central journal article supplement (PMC7080791; doi:10.1038/s41467-020-14998-3), 2020-03-18
Supplement: 41467_2020_14998_MOESM4_ESM.pdf [file 41467_2020_14998_MOESM4_ESM.pdf]

**Title:** Supplementary Data 1:

**Description:** Full GenomeScope results on simulated data. Results for triploid, tetraploid, pentaploid, and hexaploid simulated datasets are in separate sheets. Mean absolute errors are located at the bottom of each sheet.
